# Supplementary material for: Impact of adaptive natural killer cells, KLRC2 genotype and cytomegalovirus reactivation on late mortality in patients with severe COVID‐19 lung disease
Source: PubMed Central journal article supplement — Clin Transl Immunology. 2022 Jan 11;11(1):e1359. doi: 10.1002/cti2.1359 (PMC8752325; doi:10.1002/cti2.1359), 2022-01-11
Supplement: CTI2-11-e1359-s001.pdf [file CTI2-11-e1359-s001.pdf]

## Supplementary figure 1

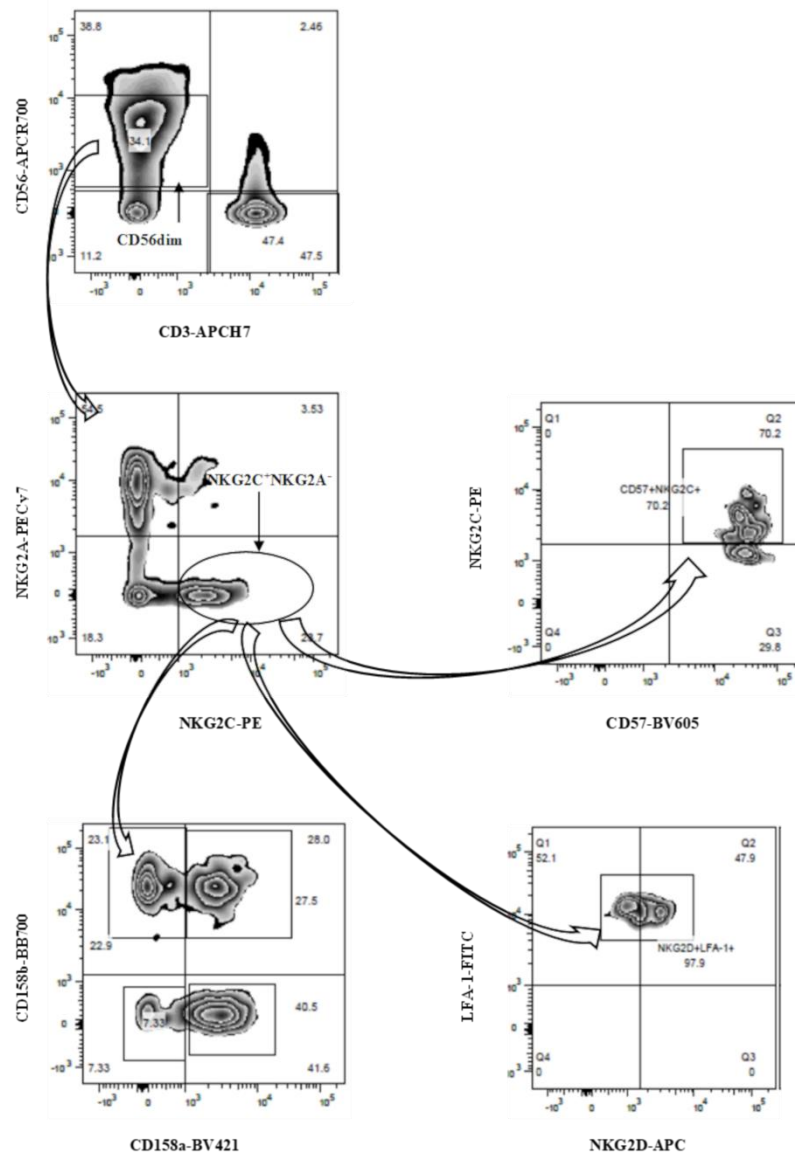

**Supplementary Figure 1 Flow cytometry gating strategy for NK cells:** PBMC were stained for NK cell markers CD56, CD57, NKG2C, NKG2A, NKG2D, CD158a, Cd158b and T cell marker CD3. (Top left panel) Shows the gating of NK cell from lymphocytes by selecting CD56<sup>+</sup> CD3<sup>-</sup> population. (Middle left panel) shows the gating of NKG2C<sup>+</sup>/NKG2A<sup>-</sup> and NKG2C<sup>-</sup>/NKG2A<sup>+</sup> population gated from CD56<sup>+</sup> CD3<sup>-</sup> NK cells. (Middle right panel) shows the gating of NKG2C<sup>+</sup>CD57<sup>+</sup> NK cell population from NKG2C<sup>+</sup>/NKG2A<sup>-</sup>. (Bottom left panel) shows the CD158a and CD158b NK cell population gated from NKG2C<sup>+</sup>/NKG2A<sup>-</sup>

. (Bottom right panel) shows the gating of LFA-1 and NKG2D population gated from NKG2C<sup>+</sup>/NKG2A<sup>-</sup>.

## Supplementary figure 2

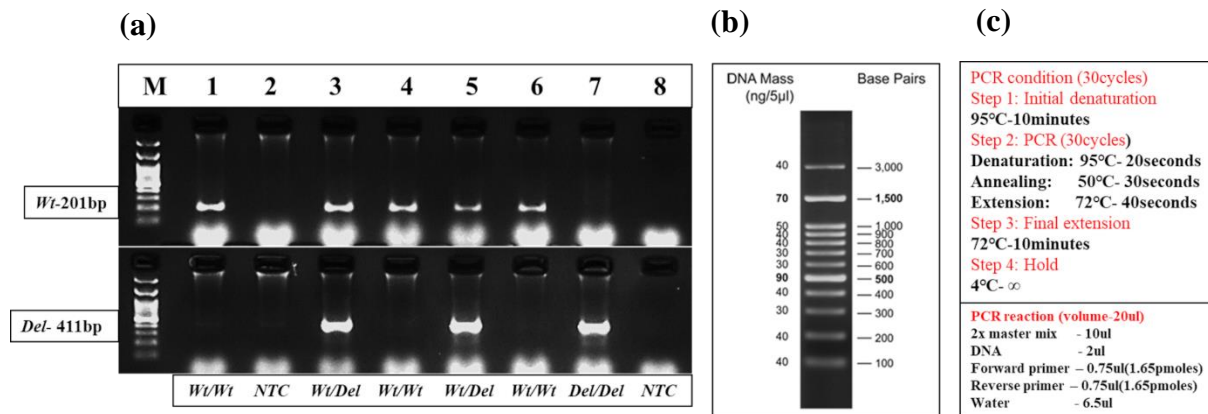

**Supplementary figure 1 KLRC2 genotyping by conventional PCR:** (a) Above image represents the KLRC2 Conventional PCR gel image. DNA samples were isolated from the human samples. Isolated DNA samples were used for the PCR amplification of KLRC2 Wild type (*Wt*) and Deletion (*Del*) gene (Primers details were mentioned in the methodology). For conventional PCR, 2 $\mu$ l of DNA samples were used and 30 cycles were used for amplification for both conditions. Top gel image shows the Wild type results and bottom image shows the Deletion type results. Samples labelled as M- 100bp DNA ladder, Samples 1- Homozygous Wild type positive control, Sample 2- NTC(non template control), Sample 3- Heterozygous both Wild type and Deletion positive control, Sample 4- Homozygous Wild type positive, Sample 5- Heterozygous both Wild type and Deletion positive, Sample 6- Homozygous Wild type positive, Sample 7- Homozygous Deletion positive Sample 8- NTC (Non Template Control). (b) 100bp DNA ladder data sheet image. (c) PCR condition and PCR reaction preparation.

**Supplementary table 1**

| <b>S.No.</b> | <b>Primers</b>           | <b>Sequences</b>                   |
|--------------|--------------------------|------------------------------------|
| 1.           | KLRC2 Wt Forward primer  | <i>5' CAGTGTGGATCTTCAATG 3'</i>    |
| 2.           | KLRC2 Wt Reverse primer  | <i>5' TTAGTAATTGTGTGCATCCTA 3'</i> |
| 3.           | KLRC2 Del Forward primer | <i>5' ACTCGGATTTCTATTTGATGC 3'</i> |
| 4.           | KLRC2 Del Reverse primer | <i>5'ACAAGTGATGTATAAGAAAAAG 3'</i> |
